# Supplementary material for: Prevalence of oral submucous fibrosis across diverse populations: a systematic review and meta-analysis
Source: PeerJ. 2024 Nov 6;12:e18385. doi: 10.7717/peerj.18385 (PMC11549909; doi:10.7717/peerj.18385)
Supplement: Data S1 [file peerj-12-18385-s006.xlsx]

## Sheet: raw data
Num	Year	Author	Region#	Mean age	Age_rank	Samples	Cases	Men_Samples	Men_Cases	Women_Samples	Women_Cases	p_man	se_man	p_woman	se_woman	p	se	Tobacco_use	Alcohol_use	Areca_betel_nut_use	Mean_age
18	2008	Alvarez Gómez GJ	American	59.3	50-60	1914	13	NA	NA	NA	NA	NA	NA	NA	NA	0.0067921	0.0018774	0.245	0.065	NA	59.3
41	2014	Villa A	American	43	40-50	3142	1	NA	NA	NA	NA	NA	NA	NA	NA	0.0003183	0.0003182	0.242	0.361	NA	43
6	1992	Ikeda N	Cambodian	60.5	>60	1319	2	366	1	953	1	0.0027322	0.0027285	0.0010493	0.0010488	0.0015163	0.0010714	0.25	0.11	0.34	60.5
2	1984	Pindborg JJ	China	54	50-60	100	3	44	0	56	3	0	NA	0.0535714	0.0300896	0.03	0.0170587	0.5	NA	0.95	54
7	1997	Tang JG	China	40.45	40-50	11046	335	6057	252	4989	83	0.0416048	0.0025658	0.0166366	0.0018109	0.0303277	0.0016317	0.24	0.05	0.65	40.45
28	2011	Lee, C	China	54.7	50-60	2356	23	1225	22	1131	1	0.0179592	0.0037944	0.0008842	0.0008838	0.0097623	0.0020256	0.32	0.217	0.155	54.7
32	2012	Zhang SS	China	43.5	40-50	2356	24	1225	23	1131	1	0.0187755	0.003878	0.0008842	0.0008838	0.0101868	0.0020687	0.3196	0.2193	0.162	43.5
55	2022	Liu Y	China	40.44	40-50	15705	499	7576	489	8129	10	0.0645459	0.0028231	0.0012302	0.0003888	0.0317733	0.0013996	NA	NA	NA	40.44
55	2022	Liu Y	China	38.12	<40	3098	16	659	14	2439	2	0.0212443	0.0056171	0.00082	0.0005796	0.0051646	0.0012878	NA	NA	NA	38.12
55	2022	Liu Y	China	44.2	40-50	1101	80	839	79	262	1	0.0941597	0.0100827	0.0038168	0.0038095	0.0726612	0.0078231	NA	NA	NA	44.2
1	1968	Pindborg JJ	India	38.079	<40	50915	63	12728	16	38187	47	0.0012571	0.0003141	0.0012308	0.0001794	0.0012374	0.0001558	NA	NA	NA	38.079
4	1989	Gupta. PC	India	NA	>60	12212	25	NA	NA	NA	NA	NA	NA	NA	NA	0.0020472	0.000409	NA	NA	NA	NA
5	1992	Rajendran R	India	34.8	<40	1462	4	602	1	860	3	0.0016611	0.0016597	0.0034884	0.0020105	0.002736	0.0013661	0.247	NA	0.424	34.8
9	1998	Gupta PC	India	36.85	<40	21872	164	11262	164	10590	0	0.0145622	0.0011288	0	NA	0.0074982	0.0005833	0.42	NA	0.36	36.85
10	2000	Sankararayan R	India	NA	>60	49179	175	NA	NA	NA	NA	NA	NA	NA	NA	0.0035584	0.0002685	0.347	0.178	0.322	NA
15	2005	Saraswathi TR	India	NA	>60	2017	20	1287	12	730	8	0.009324	0.002679	0.0109589	0.0038533	0.0099157	0.0022062	0.25	0.12	0.14	NA
16	2006	Thavarajah R	India	37	<40	500	40	NA	NA	NA	NA	NA	NA	NA	NA	0.08	0.0121326	0.818	0.97	0.672	37
19	2008	Dagli RJ	India	47	40-50	324	9	NA	NA	NA	NA	NA	NA	NA	NA	0.0277778	0.0091298	0.41	NA	NA	47
20	2008	Mathew AL	India	50	40-50	1190	24	747	23	443	1	0.0307898	0.0063205	0.0022573	0.0022548	0.0201681	0.0040751	0.1033	0.03	0.14	50
21	2008	Mehrotra R	India	58	50-60	67909	144	NA	52	NA	92	NA	NA	NA	NA	0.0021205	0.0001765	NA	NA	NA	58
22	2009	Rooban T	India	37.3	<40	500	40	NA	NA	NA	NA	NA	NA	NA	NA	0.08	0.0121326	0.65	1	0.56	37.3
24	2010	Mehrotra R	India	NA	>60	3030	21	NA	NA	NA	NA	NA	NA	NA	NA	0.0069307	0.0015072	0.2095	NA	0.4198	NA
26	2011	Byakodi R	India	NA	>60	24422	152	NA	146	NA	6	NA	NA	NA	NA	0.0062239	0.0005033	0.51	0.33	NA	NA
27	2012	Chandra P	India	NA	>60	1525	33	NA	NA	NA	NA	NA	NA	NA	NA	0.0216393	0.0037259	0.235	NA	NA	NA
29	2012	Gupta T	India	36	<40	126	8	NA	NA	NA	NA	NA	NA	NA	NA	0.0634921	0.0217235	0.95	0.29	0.07	36
30	2012	Reddy V	India	41.25	40-50	800	80	NA	NA	NA	NA	NA	NA	NA	NA	0.1	0.0106066	NA	NA	NA	41.25
31	2012	Sujatha D	India	52.4	50-60	1028	84	904	65	124	19	0.0719027	0.0085918	0.153226	0.0323474	0.0817121	0.0085435	0.69	0.013	0.076	52.4
33	2013	Bhatgar P	India	NA	>60	8866	177	5187	146	3679	31	0.0281473	0.0022965	0.0084262	0.001507	0.0199639	0.0014855	0.21	NA	NA	NA
34	2013	Patil PB	India	34.39	<40	1200	85	1067	77	133	8	0.0721649	0.0079217	0.0601504	0.0206169	0.0708333	0.0074059	0.143	0.01	0.363	34.39
36	2014	Arjun TN	India	31.78	<40	244	21	NA	NA	NA	NA	NA	NA	NA	NA	0.0860656	0.0179547	0.77	NA	NA	31.78
38	2014	Kumar Srivastava V	India	NA	>60	872	6	NA	NA	NA	NA	NA	NA	NA	NA	0.0068807	0.0027994	0.141	NA	NA	NA
39	2014	ir PP	India	40.68	40-50	2033	331	NA	NA	NA	NA	NA	NA	NA	NA	0.162814	0.0081882	0.583	NA	0.087	40.68
40	2014	Nigam NK	India	37.8	<40	1000	63	678	55	332	8	0.0811209	0.0104853	0.0240964	0.0084161	0.063	0.0076832	0.56	NA	0.23	37.8
42	2015	Chatterjee R	India	45.27	40-50	2175	60	1551	52	624	8	0.0335268	0.0045707	0.0128205	0.0045036	0.0275862	0.0035119	NA	NA	1	45.27
43	2015	Kumar S	India	NA	>60	1241	100	NA	NA	NA	NA	NA	NA	NA	NA	0.0805802	0.0077265	0.2667	0.1459	0.3626	NA
44	2015	Patil S	India	69	>60	5100	1530	NA	NA	NA	NA	NA	NA	NA	NA	0.3	0.0064169	NA	NA	NA	69
45	2015	Reddy SS	India	49.6	40-50	901	91	554	70	347	21	0.126354	0.0141159	0.0605187	0.0128004	0.100999	0.0100387	0.315	NA	NA	49.6
46	2017	Ali AK	India	31.76	<40	2163	201	NA	NA	NA	NA	NA	NA	NA	NA	0.0929265	0.0062426	0.9024	NA	NA	31.76
47	2017	Mehrotra D	India	35.67	<40	402669	5211	NA	NA	NA	NA	NA	NA	NA	NA	0.0129411	0.0001781	0.2413	NA	NA	35.67
48	2018	Hallikeri K	India	53	50-60	2455	342	2280	328	175	14	0.14386	0.0073498	0.08	0.0205078	0.139308	0.0069885	0.3126	NA	0.5715	53
49	2018	Krish Priya M	India	38.29	<40	300	15	NA	NA	NA	NA	NA	NA	NA	NA	0.05	0.0125831	0.493	0.3366	0.17	38.29
50	2019	Kumar S	India	45.1	40-50	1048	26	489	10	667	16	0.0204499	0.0064004	0.023988	0.0059246	0.0248092	0.0048047	0.1898	0.1202	0.165	45.1
51	2019	Verma S	India	46.29	40-50	872	54	NA	NA	NA	NA	NA	NA	NA	NA	0.0619266	0.008162	0.5126	NA	NA	46.29
52	2019	Yunus G Y	India	44.82	40-50	185	25	NA	NA	NA	NA	NA	NA	NA	NA	0.135135	0.0251346	0.822	NA	NA	44.82
53	2021	Agrawal S	India	31.66	<40	500	40	NA	NA	NA	NA	NA	NA	NA	NA	0.08	0.0121326	NA	NA	NA	31.66
54	2022	Jacob LB	India	38.26	<40	930	17	NA	NA	NA	NA	NA	NA	NA	NA	0.0182796	0.0043927	0.3129	NA	NA	38.26
56	2023	Jose C	India	42.32	40-50	1400	87	NA	NA	NA	NA	NA	NA	NA	NA	0.0621429	0.0064521	0.2964	NA	0.6371	42.32
57	2023	Kaur A	India	36.7	<40	583	29	NA	NA	NA	NA	NA	NA	NA	NA	0.0497427	0.0090043	0.346	NA	NA	36.7
58	2023	Oswal K	India	46.6	40-50	4974	33	NA	NA	NA	NA	NA	NA	NA	NA	0.0066345	0.0011511	0.2176	0.2176	0.2176	46.6
59	2023	Rani P	India	45.59	40-50	5297	120	NA	NA	NA	NA	NA	NA	NA	NA	0.0226543	0.0020445	NA	NA	NA	45.59
61	2023	Singh G	India	45.188	40-50	1000	40	712	24	288	16	0.0337079	0.0067636	0.0555556	0.0134976	0.04	0.0061968	0.77	NA	NA	45.188
28	2011	Lee, C	Indonesia	58.3	50-60	1941	74	965	11	976	63	0.011399	0.0034173	0.0645492	0.0078656	0.0381247	0.0043466	0.412	0.229	0.441	58.3
62	2024	Sari EF	Indonesia	42	40-50	973	22	748	1	479	21	0.0013369	0.001336	0.0438413	0.0093549	0.0226105	0.0047658	0.145	0.039	0.126	42
8	1998	Zain RB	Malaysia	44.5	40-50	11707	7	4698	1	6999	6	0.0002129	0.0002128	0.0008573	0.0003498	0.0005979	0.0002259	NA	NA	NA	44.5
13	2005	Oakley E	Micronesia	16.3	<40	309	27	NA	NA	NA	NA	NA	NA	NA	NA	0.0873786	0.0160646	0.439	0.262	0.634	16.3
60	2023	Shrestha G	Nepal	44.3	40-50	1930	28	NA	NA	NA	NA	NA	NA	NA	NA	0.0145078	0.0027218	0.32	0.11	NA	44.3
35	2014	Al-Attas SA	Saudi Arabia	34.9	<40	599	3	NA	NA	NA	NA	NA	NA	NA	NA	0.0050083	0.0028843	0.656	NA	0.077	34.9
F	1988	Seedat HA	South Africa	51.6	50-60	186	71	13	1	173	70	0.0769231	0.0739053	0.404624	0.0373163	0.38172	0.0356212	NA	NA	1	51.6
17	2007	Ariyawarda A	Sri Lanka	NA	>60	12716	209	488	167	671	42	0.342213	0.0214774	0.0625931	0.0093512	0.016436	0.0011275	0.31	0.61	0.92	NA
23	2010	Amarasinghe HK	Sri Lanka	NA	>60	1029	25	374	11	655	14	0.0294118	0.0087366	0.021374	0.0056511	0.0242954	0.0047997	0.1954	0.2879	0.6602	NA
63	2024	Sumithrarachchi S	Sri Lanka	42.21	40-50	368	3	NA	NA	NA	NA	NA	NA	NA	NA	0.0081522	0.0046874	0.239	NA	0.253	42.21
11	2001	Yang YH	China	52.3	50-60	2059	56	1048	19	1011	37	0.0181298	0.0041214	0.0365974	0.0059055	0.0271977	0.0035847	0.39	0.295	0.823	52.3
12	2005	Chung CH	China	49.8	40-50	1075	17	526	17	549	0	0.0323194	0.0077109	0	NA	0.015814	0.003805	0.2084	0.1814	0.0716	49.8
14	2005	Yang YH	China	58	50-60	194	2	79	1	115	1	0.0126582	0.0125779	0.0086957	0.0086578	0.0103093	0.0072521	0.21	NA	0.1	58
25	2010	Yang YH	China	50.25	50-60	2020	89	723	38	1297	51	0.0525588	0.0082991	0.0393215	0.0053968	0.0440594	0.0045662	0.1722	0.3678	0.3539	50.25
28	2011	Lee, C	China	52.4	50-60	1548	7	737	7	811	0	0.009498	0.0035728	0	NA	0.004522	0.0017053	0.233	0.129	0.068	52.4
37	2014	Chiang M	China	49.7	40-50	2050	8	912	8	1138	0	0.0087719	0.0030877	0	NA	0.0039024	0.001377	NA	NA	NA	49.7
