# Supplementary material for: Prevalence of oral submucous fibrosis across diverse populations: a systematic review and meta-analysis
Source: PeerJ journal article supplement (doi:10.7717/peerj.18385), 2024-11-06

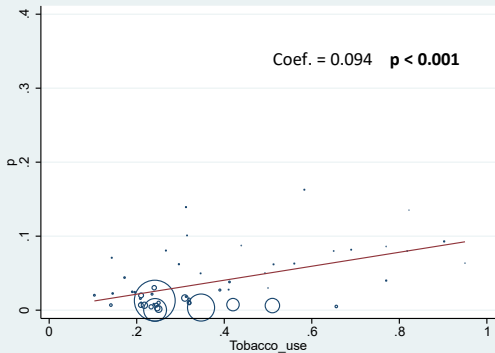

Supplement: MetaRegression_analysis_of_Tobacco.pdf [file MetaRegression_analysis_of_Tobacco.pdf]
