# Supplementary material for: Prevalence of oral submucous fibrosis across diverse populations: a systematic review and meta-analysis
Source: PeerJ. 2024 Nov 6;12:e18385. doi: 10.7717/peerj.18385 (PMC11549909; doi:10.7717/peerj.18385)
Supplement: Supplemental Information 2 [file peerj-12-18385-s002.xlsx]

## Sheet: JBI_results
Study num	Item 1	Item 2	Item 3	Item 4	Item 5	Item 6	Item 7	Item 8	Item 9
1	Yes	Yes	Yes	Yes	Yes	No	Yes	Unclear	Yes												7
2	No	No	Yes	Yes	No	No	Yes	Unclear	Yes												4
3	Yes	Yes	Unclear	Yes	Yes	No	Yes	Unclear	Unclear												5
4	Yes	Yes	Yes	Yes	Yes	No	Yes	Unclear	Unclear												6
5	Unclear	No	Yes	Yes	Yes	No	Yes	Unclear	Unclear												4
6	Yes	Yes	Yes	Yes	Yes	Yes	Unclear	Unclear	Yes												7
7	Unclear	Yes	Unclear	Yes	Unclear	No	Yes	Unclear	Unclear												3
8	Yes	Yes	Yes	Yes	Unclear	Yes	Yes	Unclear	Unclear												6
9	Yes	Yes	Yes	Yes	Yes	No	Yes	Unclear	Unclear												6
10	Unclear	Yes	Yes	Yes	Unclear	No	Yes	Unclear	Unclear												4
11	Yes	Yes	Yes	Yes	Yes	Yes	Yes	Yes	Unclear												8
12	Yes	Yes	Yes	Yes	Yes	Unclear	Unclear	Yes	Unclear												6
13	Yes	Yes	Yes	Yes	Yes	Yes	Yes	Yes	Unclear												8
14	Yes	Yes	Yes	Yes	Yes	Yes	Yes	Yes	Yes												9
15	Unclear	Unclear	Unclear	No	Unclear	Unclear	Unclear	Yes	Unclear												1
16	Unclear	Yes	Yes	Yes	Unclear	Unclear	Yes	Yes	Unclear												5
17	Unclear	Unclear	Unclear	No	Unclear	Unclear	Yes	Unclear	Unclear												1
18	Unclear	Unclear	Unclear	Yes	Unclear	No	Yes	Yes	Unclear												3
19	Yes	Yes	Yes	Yes	Yes	Yes	Yes	Yes	Unclear												8
20	Yes	Yes	Unclear	Yes	Yes	Yes	Yes	Unclear	Unclear												6
21	Yes	Yes	Unclear	Yes	Unclear	No	Unclear	Unclear	Unclear												3
22	Yes	Yes	Unclear	Yes	Unclear	Yes	Yes	Yes	Unclear												6
23	Yes	Yes	Yes	Yes	Unclear	Yes	Yes	Yes	Yes												8
24	Yes	Yes	Yes	Yes	Yes	Yes	Yes	Yes	Yes												9
25	Yes	Yes	Yes	Yes	Yes	Yes	Yes	Yes	Unclear												8
26	Unclear	Unclear	Unclear	Unclear	Unclear	Yes	Unclear	Unclear	Unclear												1
27	Yes	Yes	Unclear	Yes	Unclear	No	Yes	Unclear	Unclear												4
28	Yes	Yes	Yes	Yes	Yes	Yes	Yes	Yes	Yes												9
29	Yes	Yes	Yes	Yes	Yes	Yes	Yes	Yes	Yes												9
30	Yes	Yes	Yes	Yes	Yes	Yes	Yes	Yes	Unclear												8
31	Yes	Yes	Yes	Yes	Unclear	Yes	Yes	No	Unclear												6
32	Yes	Yes	Yes	Yes	Yes	Unclear	Yes	Yes	Unclear												7
33	Yes	Yes	Yes	Yes	Unclear	Yes	Yes	Yes	Unclear												7
34	Unclear	Yes	Unclear	Yes	Unclear	Yes	Yes	Yes	Unclear												5
35	Yes	Unclear	Yes	Yes	Yes	Yes	Yes	Yes	Unclear												7
36	Yes	Yes	Unclear	Yes	Yes	Yes	Yes	Yes	Yes												8
37	Yes	No	Yes	Yes	Yes	Yes	Yes	Yes	Yes												8
38	Unclear	No	Yes	Yes	Unclear	Unclear	Unclear	Unclear	Unclear												2
39	Unclear	Unclear	Unclear	No	Unclear	Unclear	Unclear	Unclear	Unclear												0
40	Unclear	Yes	Yes	Yes	Unclear	Unclear	Yes	Unclear	Unclear												4
41	Yes	Yes	Unclear	Yes	Unclear	Unclear	Yes	Yes	Unclear												5
42	Yes	Yes	Unclear	Yes	Unclear	No	Yes	Yes	Unclear												5
43	Yes	Yes	Yes	Yes	Yes	Unclear	Yes	Yes	Unclear												7
44	Unclear	Unclear	Unclear	Unclear	Unclear	Yes	Unclear	Unclear	Unclear												1
45	Yes	Yes	Unclear	Yes	Unclear	Yes	Yes	Yes	Unclear												6
46	Yes	Yes	Yes	Yes	Unclear	Yes	Unclear	Unclear	Unclear												5
47	Yes	Yes	Yes	Yes	Yes	Unclear	Yes	Yes	Yes												8
48	Unclear	Yes	Unclear	Yes	Unclear	Yes	Unclear	Yes	Unclear												4
48	Unclear	Unclear	Unclear	Unclear	Unclear	Yes	Unclear	Yes	Unclear												2
49	Yes	Yes	Yes	Yes	Yes	Yes	Yes	Yes	Yes												9
50	Yes	Yes	Yes	Yes	Yes	Yes	Yes	Yes	Unclear												8
51	Yes	Yes	Yes	Yes	Unclear	Unclear	Yes	Yes	Unclear												6
52	Yes	Unclear	Yes	Yes	Unclear	Yes	Yes	Yes	Unclear												6
53	Unclear	Unclear	Yes	Yes	Unclear	Yes	Yes	Unclear	Unclear												4
54	Yes	Yes	Yes	Yes	Yes	Unclear	Yes	Yes	Unclear												7
55	Unclear	Unclear	Yes	No	Yes	Yes	Yes	Yes	Yes												6
56	Yes	Yes	Yes	Yes	Yes	Yes	Yes	Yes	Yes												9
57	Unclear	Unclear	Unclear	Yes	Unclear	Yes	Yes	Yes	Unclear												4
58	Yes	Yes	Yes	Yes	Yes	Yes	Yes	Unclear	Unclear												7
60	Yes	Yes	Yes	Yes	Unclear	Unclear	Yes	Yes	Unclear												6
61	Yes	Yes	Unclear	Yes	Unclear	No	Yes	Yes	Unclear												5
62	Yes	Yes	Yes	Yes	Yes	Yes	Yes	Yes	Yes												9
63	Yes	Yes	Yes	Yes	Unclear	Yes	Yes	Yes	Unclear												7
Yes	44	47	42	56	30	36	52	40	15
No	1	4	0	4	1	13	0	1	0
Unclear	18	12	21	3	32	14	11	22	48
Yes	44	47	42	56	30	36	52	40	15
No	1	4	0	4	1	13	0	1	0
Unclear	18	12	21	3	32	14	11	22	48
	Item 1	Item 2	Item 3	Item 4	Item 5	Item 6	Item 7	Item 8	Item 9

## Sheet: JBI_items
JBI Items
Item 1	Was the sample frame appropriate to address the target population?
Item 2	Were study participants sampled in an appropriate way?
Item 3	Was the sample size adequate?
Item 4	Were the study subjects and the setting described in detail?
Item 5	Was the data analysis conducted with sufficient coverage of the identified sample?
Item 6	Were valid methods used for the identification of the condition?
Item 7	Was the condition measured in a standard, reliable way for all participants?
Item 8	Was there appropriate statistical analysis?
Item 9	Was the response rate adequate, and if not, was the low response rate managed appropriately?
